# Supplementary material for: CDC7 kinase (DDK) inhibition disrupts DNA replication leading to mitotic catastrophe in Ewing sarcoma
Source: PubMed Central journal article supplement (PMC8882187; doi:10.1038/s41420-022-00877-x), 2022-02-26

Figure 1B – XL413 cleaved PARP

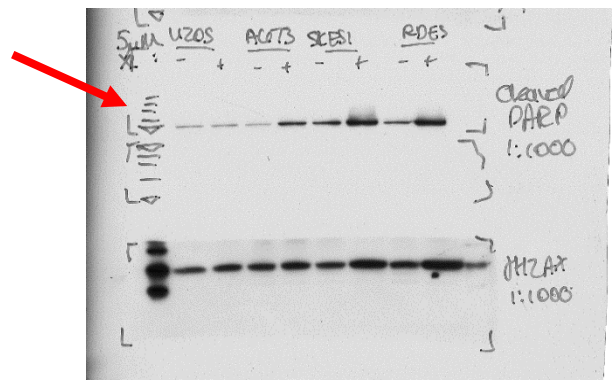

Figure 1B – XL413 GAPDH

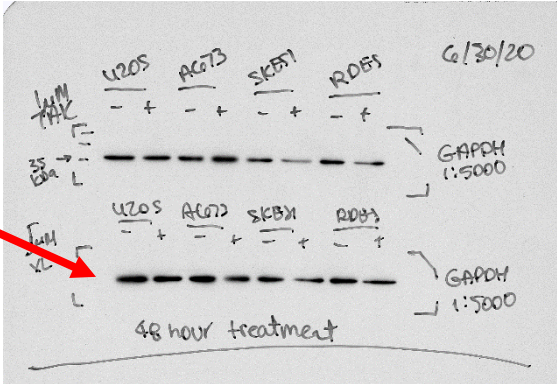

Figure 1B – TAK-931 cleaved PARP and GAPDH

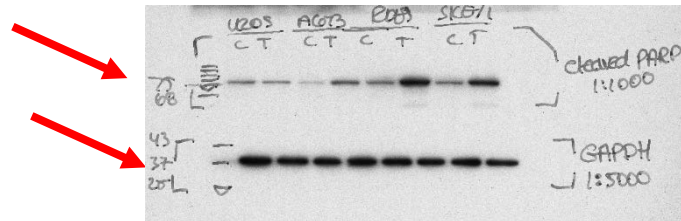

Figure 2A&B – phospho- CHK1 S345

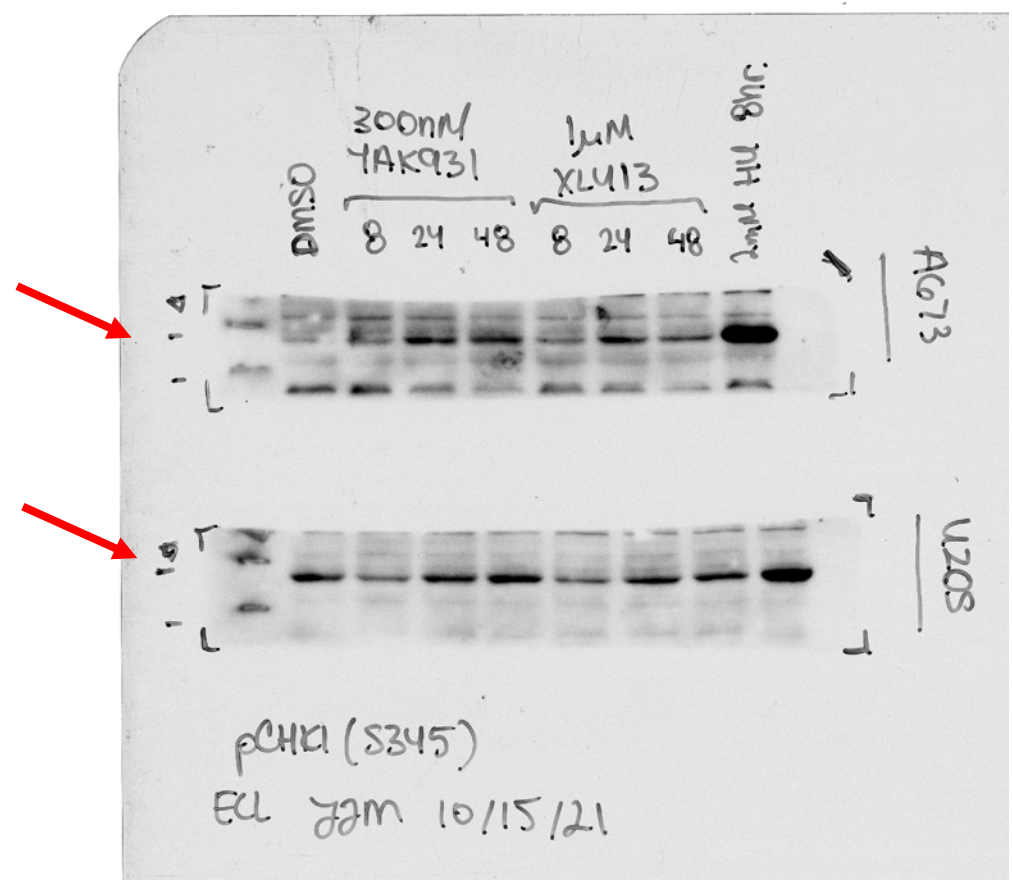

Figure 2B – total CHK1

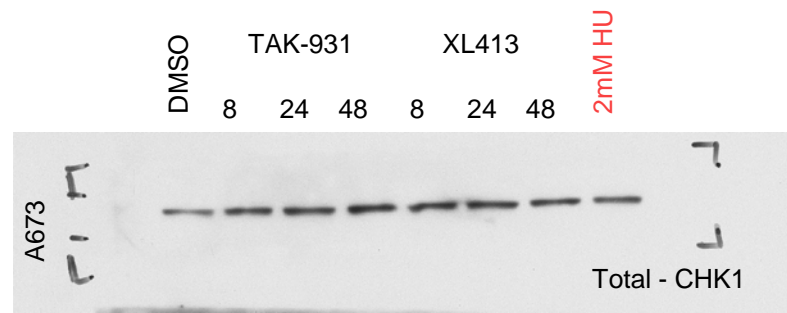

Figure 2B – vinculin

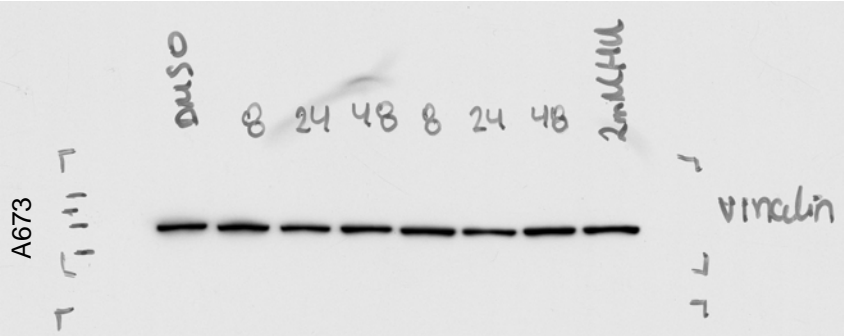

Figure 2B – total CHK1 and vinculin

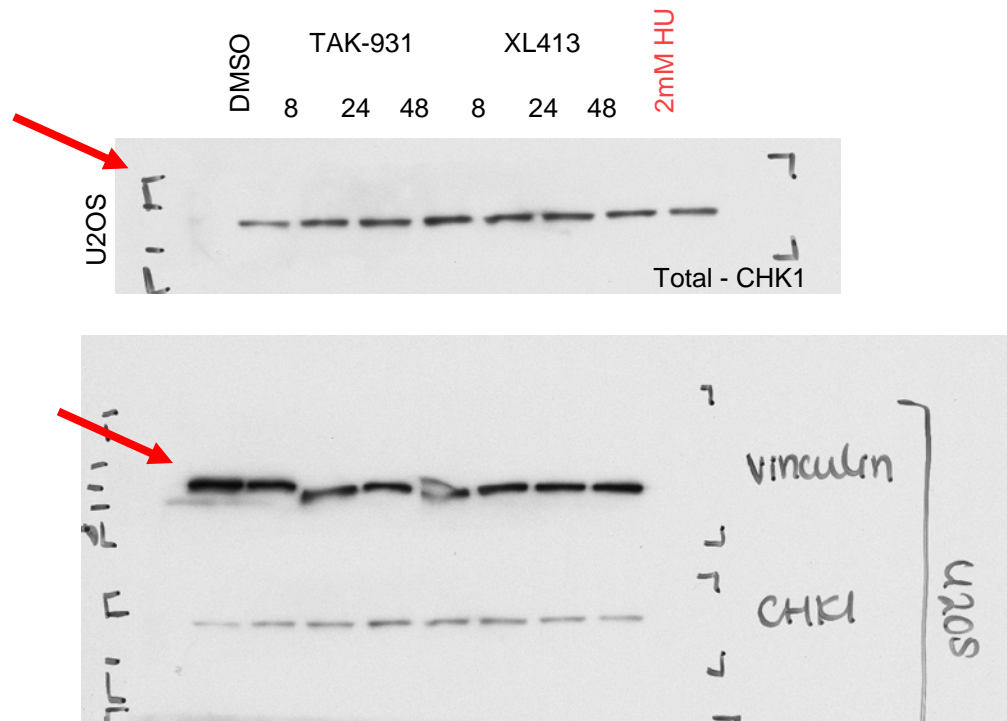

Figure 3B – pHH3 DMSO (left) TAK931 (right)

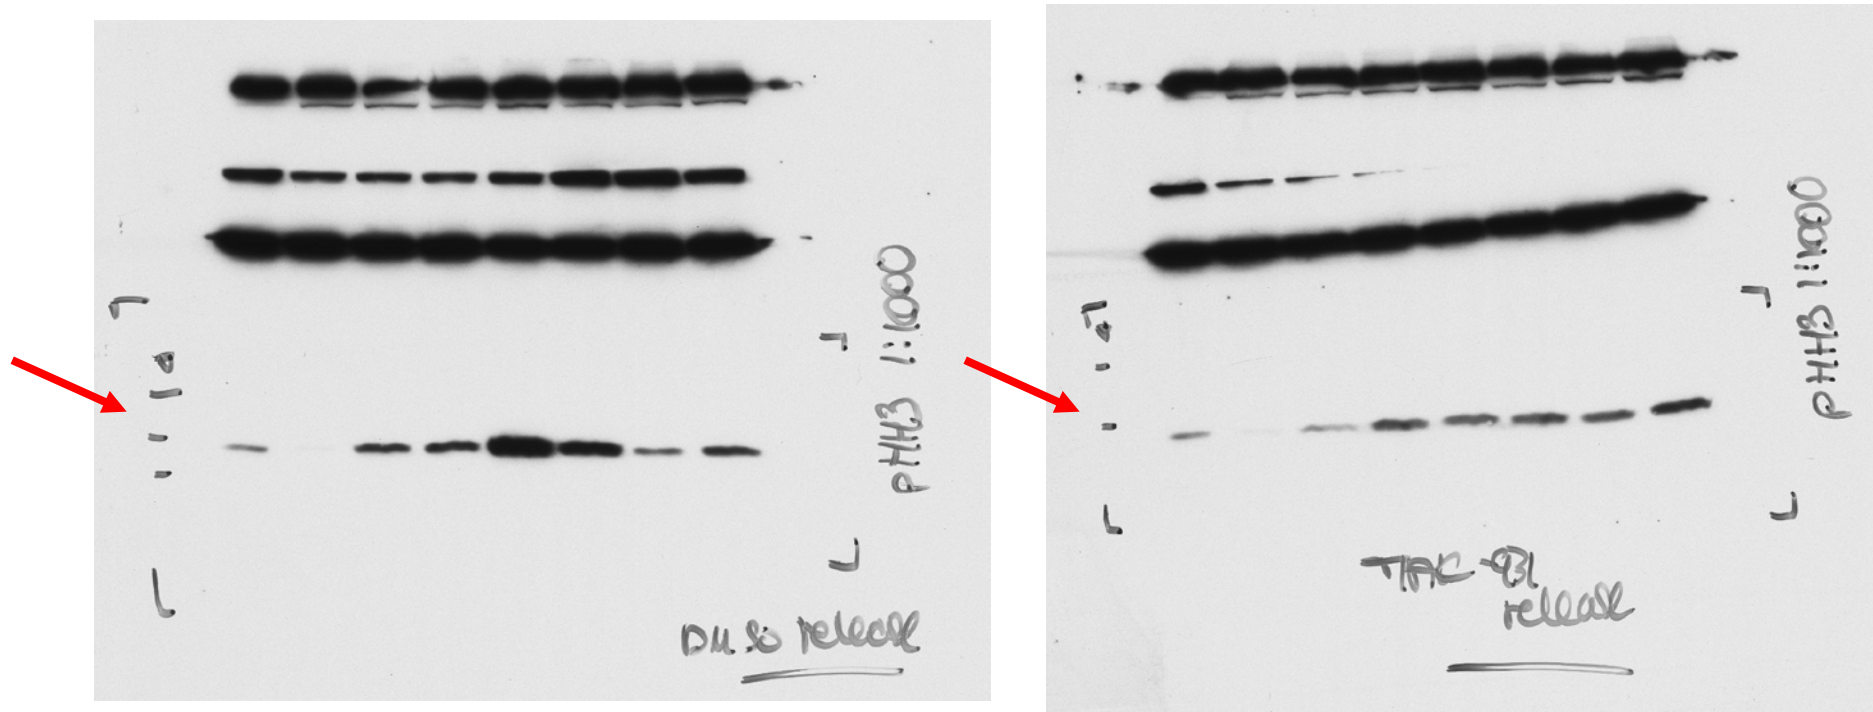



Figure 3B – CDT1 - DMSO (left) TAK931 (right)

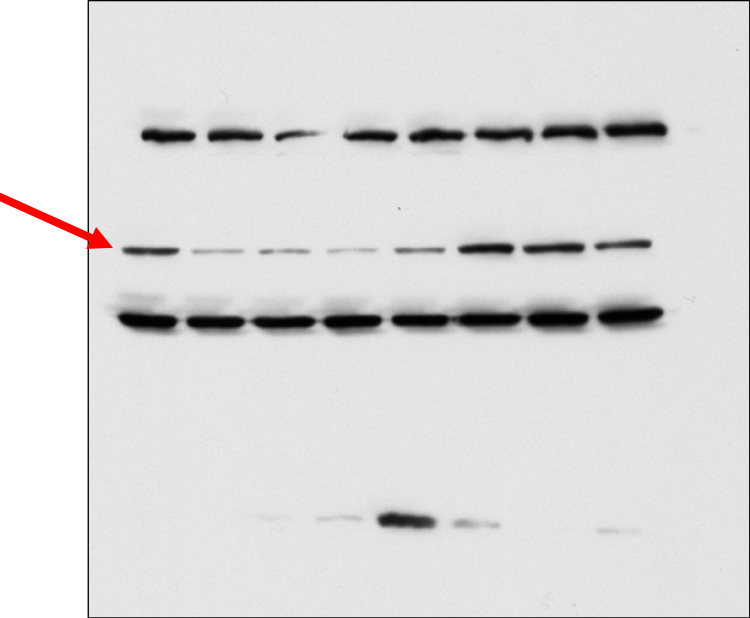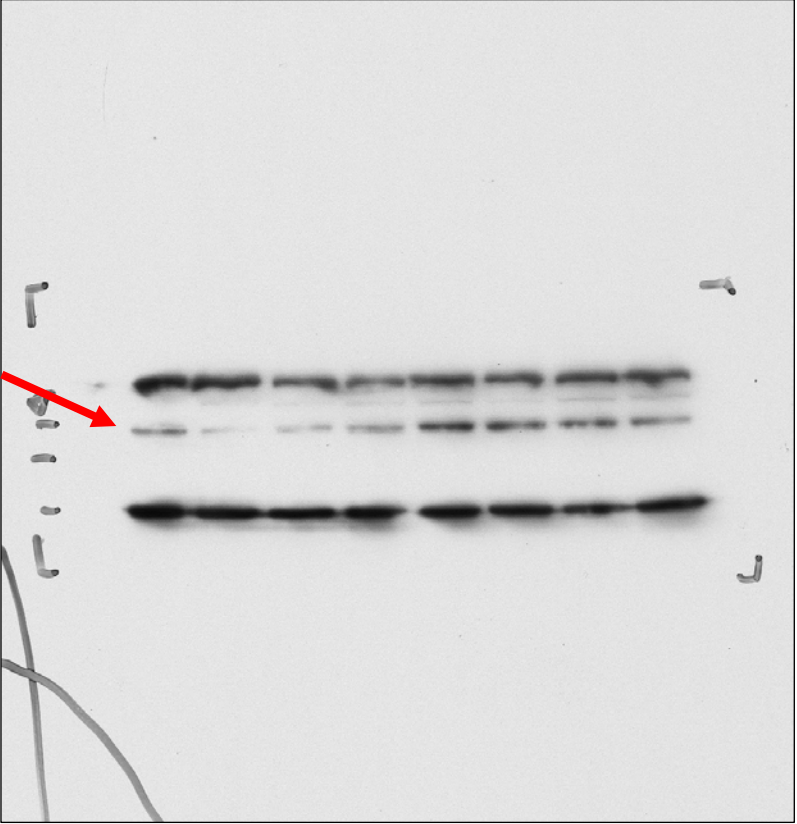

Figure 3B pCDC2, CyclinA and PARP1

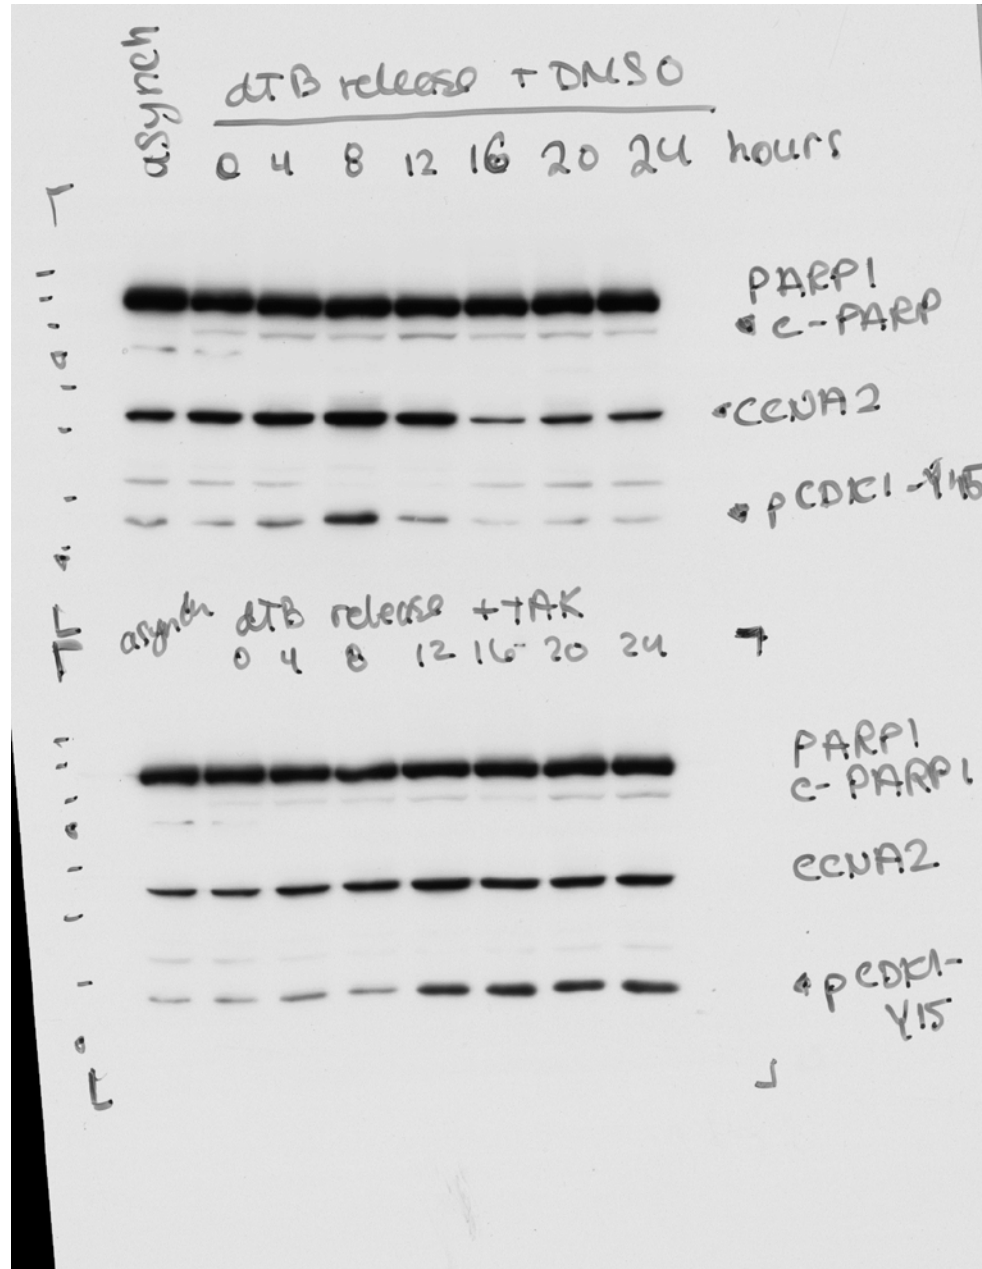

Figure 3B

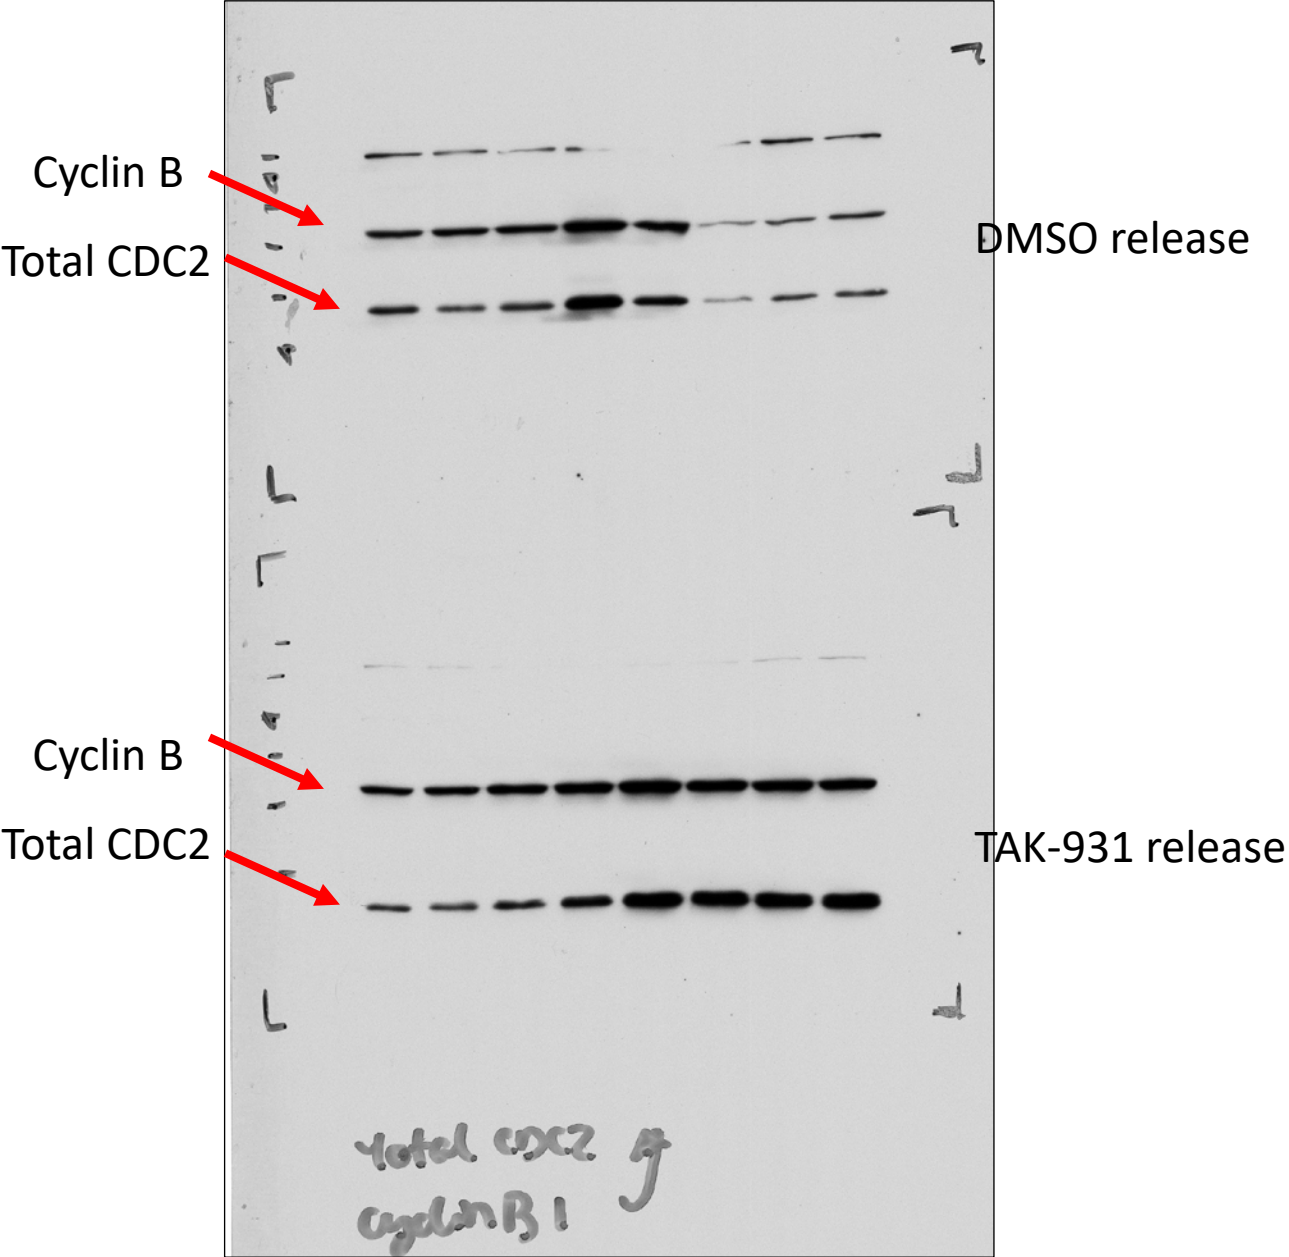

Figure 3B - GAPDH

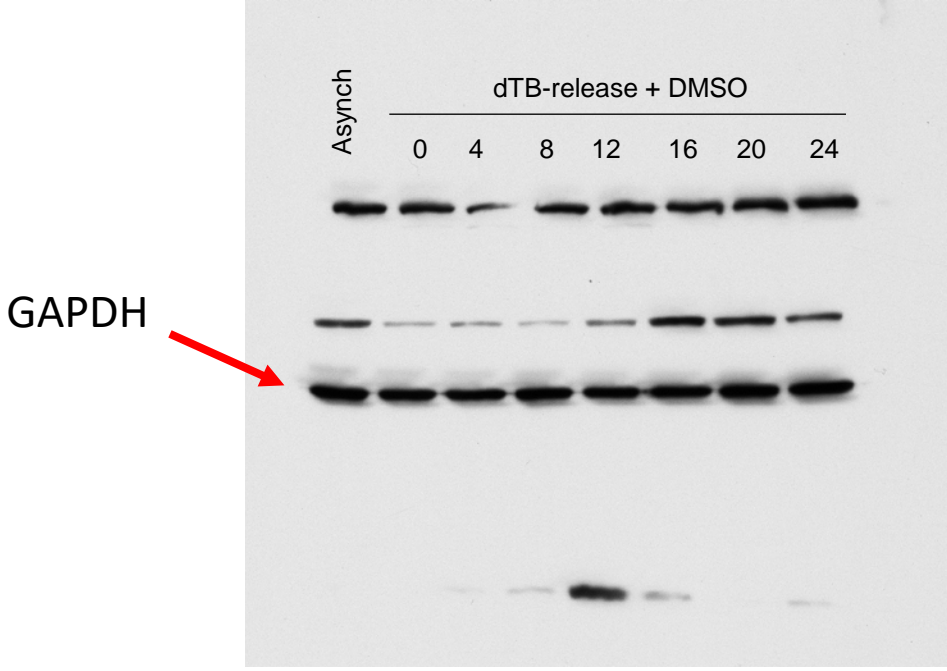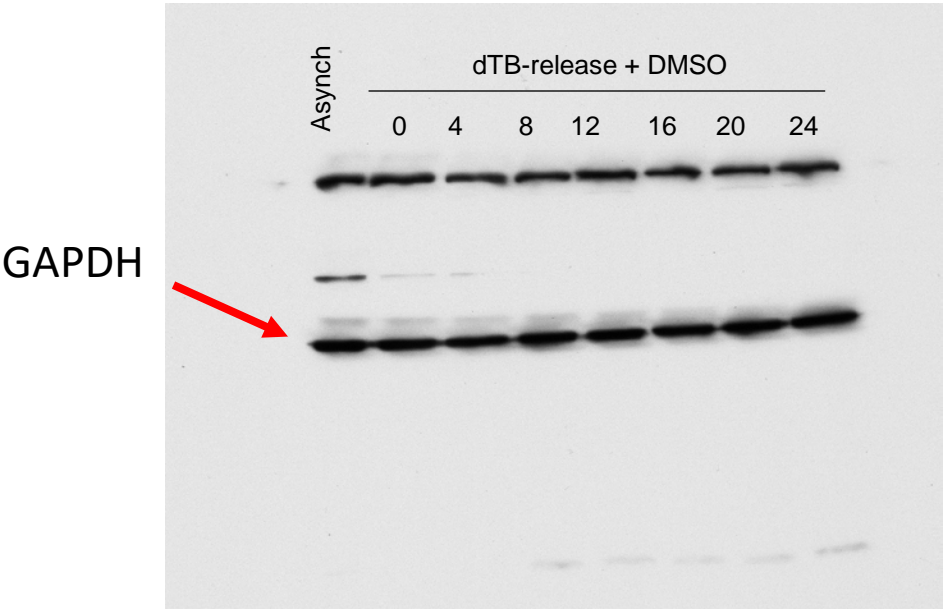

Figure 3C – p-CDC2

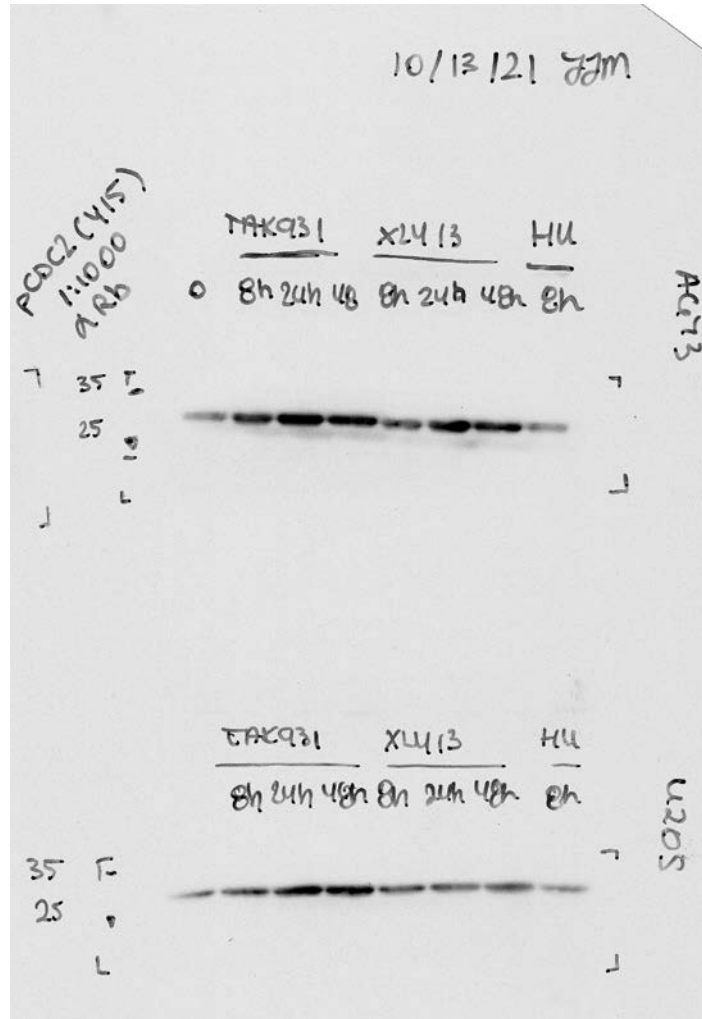

Figure 3C – total CDC2 and vinculin

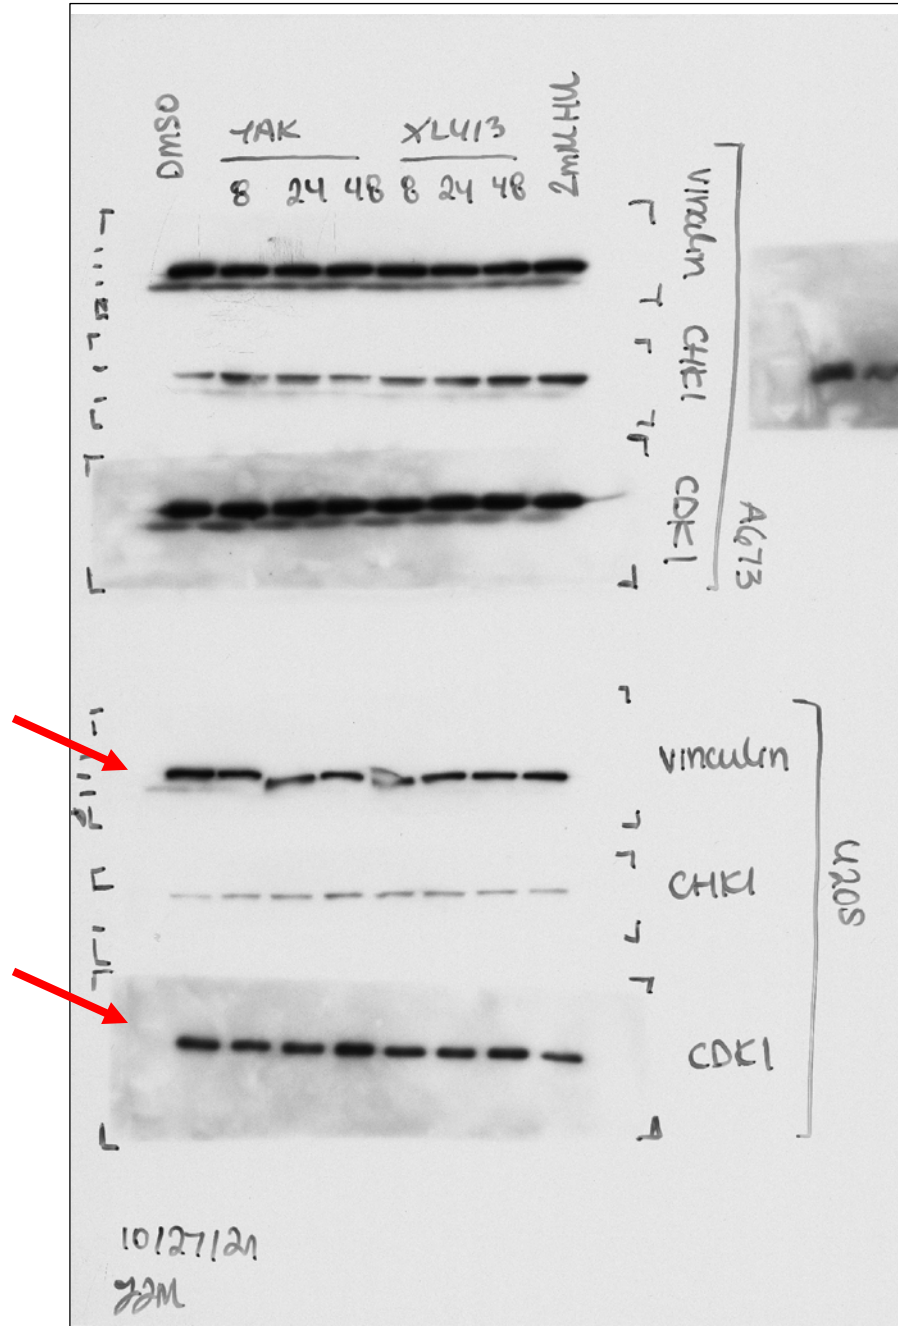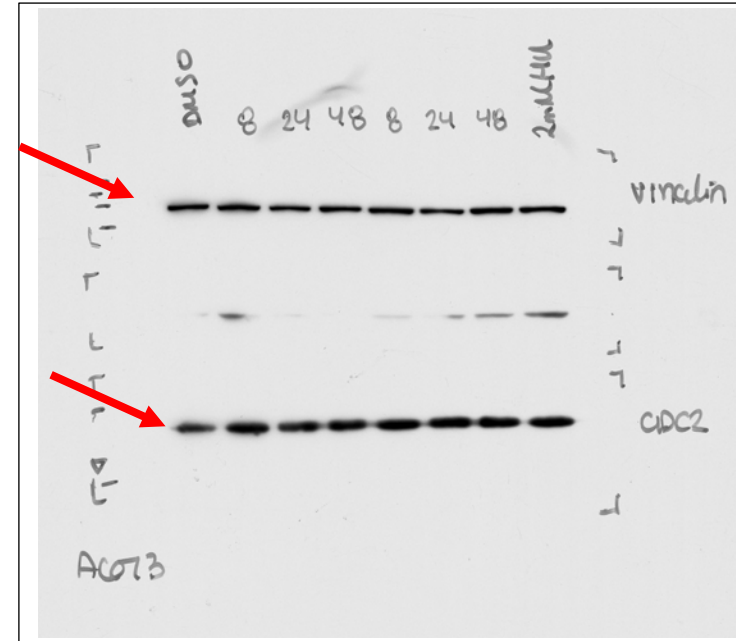

Figure 3D – PARP1 and CDT1

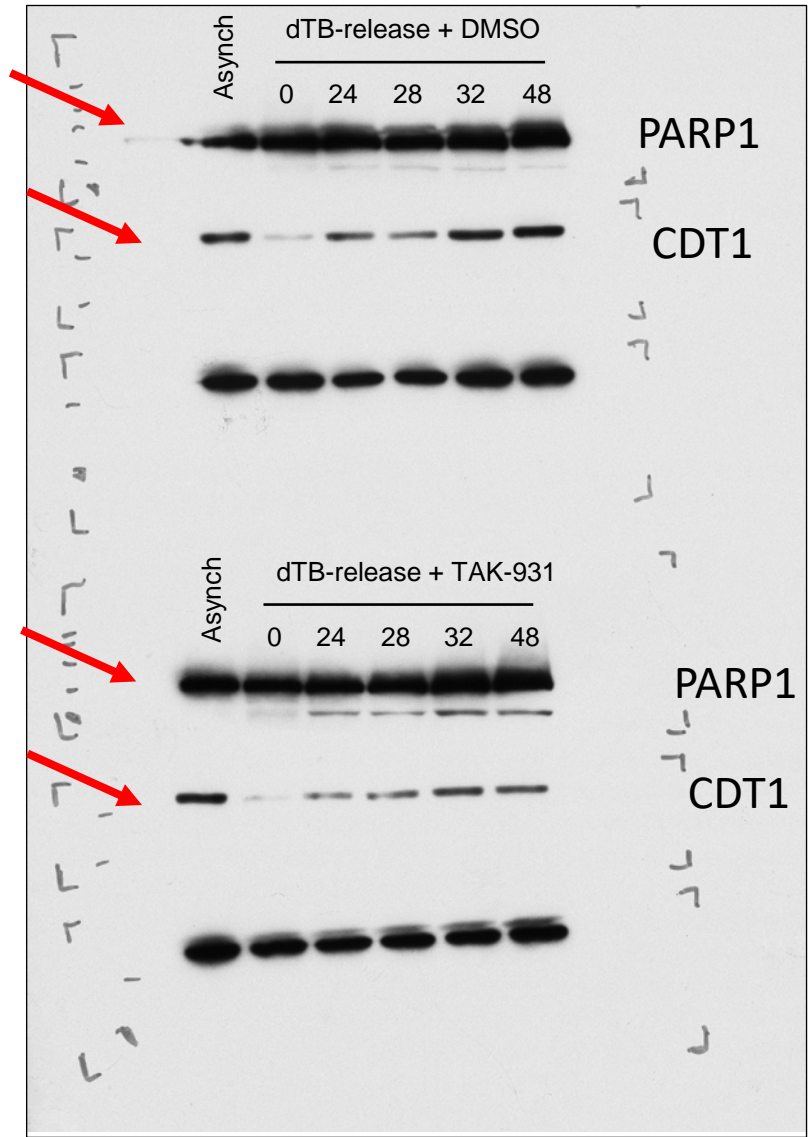

Figure 3D – pHH3

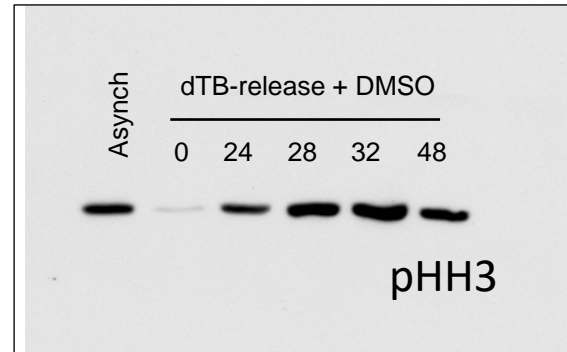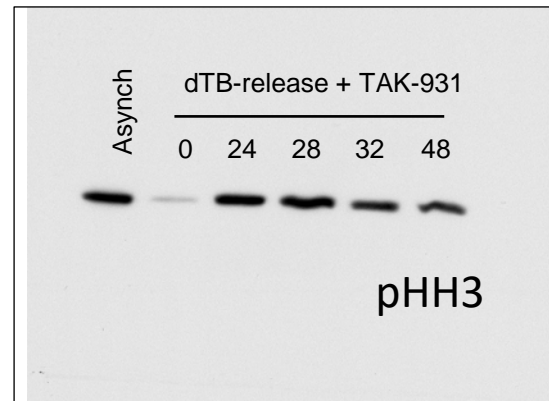



Figure 3D – cleaved caspase 3

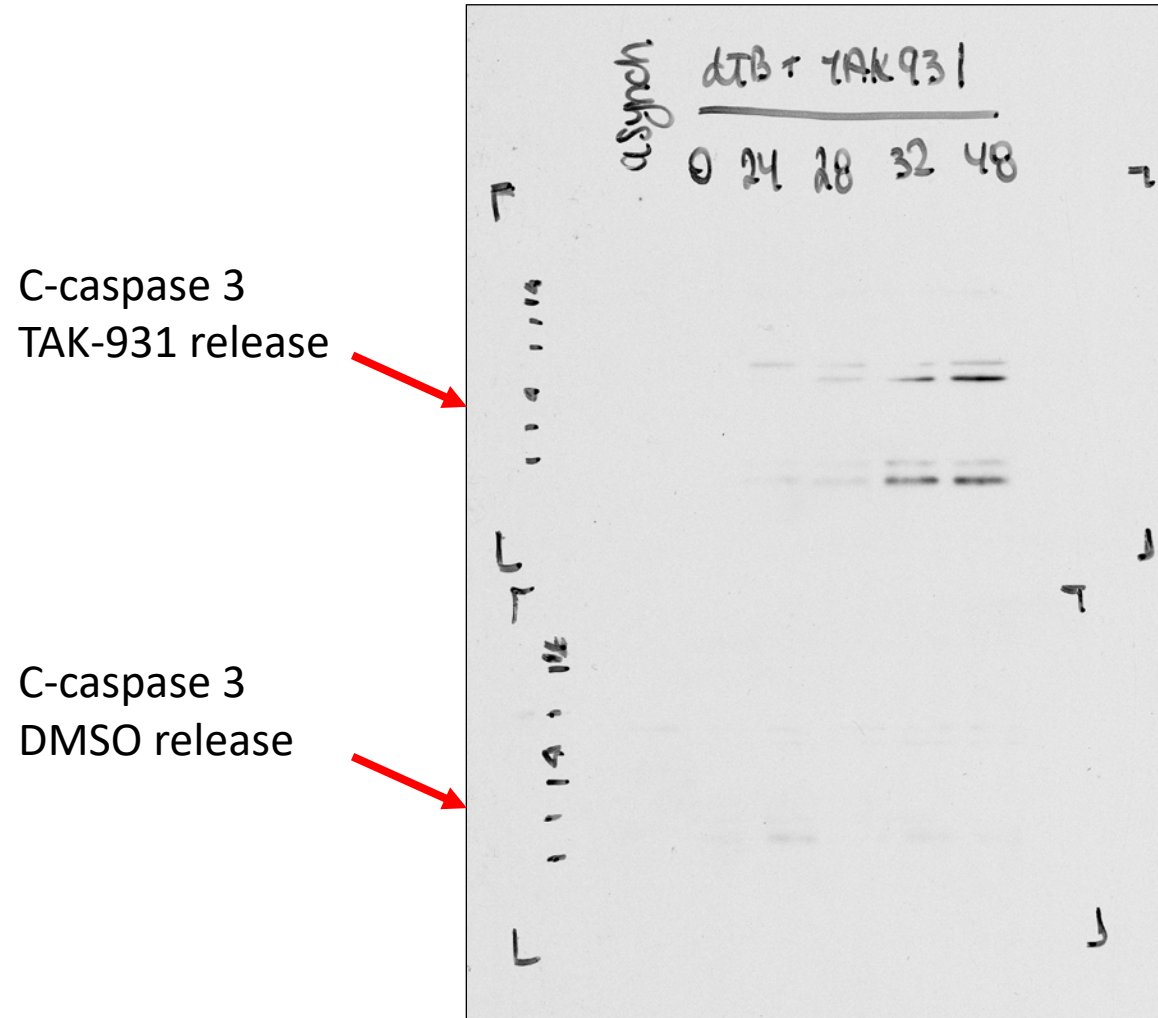



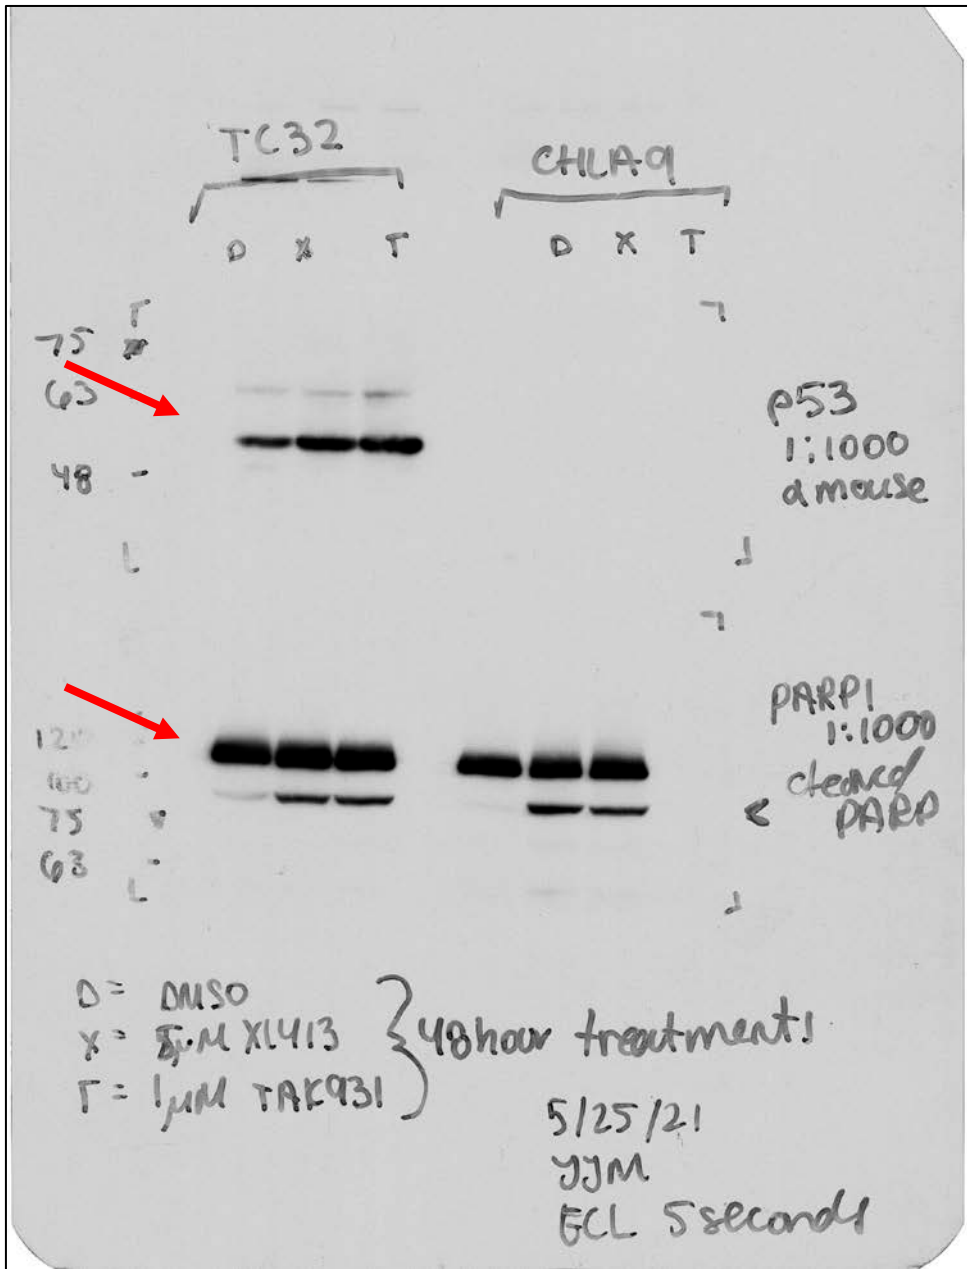

Supplemental figure 4

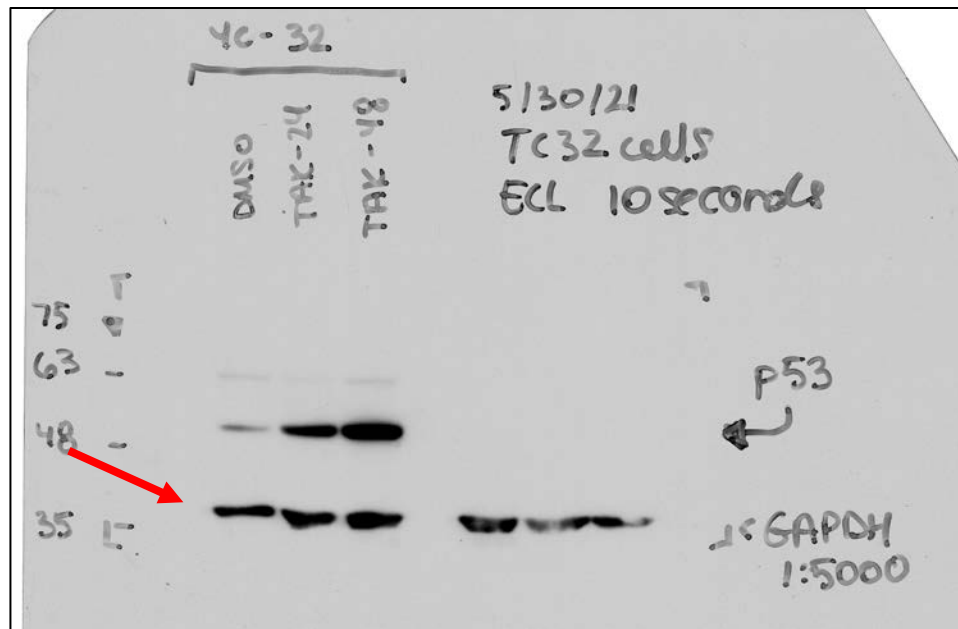

Supplement: 41420_2022_877_MOESM1_ESM.pdf [file 41420_2022_877_MOESM1_ESM.pdf]
